# Supplementary material
Source: PubMed Central journal article supplement (PMC2429989)
Supplement: NIHMS52300-supplement-01.pdf [file NIHMS52300-supplement-01.pdf]

## Supplementary Figure 1

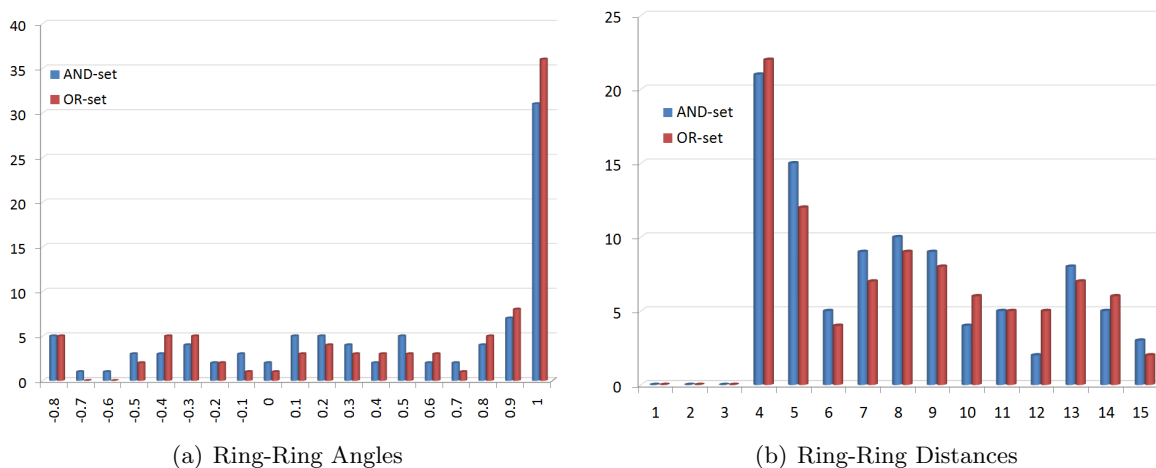

**Figure S1: Distribution of ring-ring angles and distances.** (a) A histogram of angles between the ring planes of consecutive protein interacting nucleotides. The X-axis is the cosine of the angle. The Y-axis is the frequency of occurrence in the AND-set and OR-set datasets of protein-RNA complexes. (b) An histogram of distances between the ring planes of consecutive protein interacting nucleotides. The X-axis is the distance (in Å). The Y-axis is the frequency of occurrence in the two datasets.
