# Supplementary material
Source: PubMed Central journal article supplement (PMC2429989)
Supplement: NIHMS52300-supplement-03.pdf [file NIHMS52300-supplement-03.pdf]

**Table S3: Clusters of single nucleotide binding sites.** The first column presents the cluster number according to the structure that originated the cluster. Columns 2-3 present the cluster size and the maximal SCOP distance between any two cluster members. Distance 3 means that the proteins belong to the same SCOP super family, while distance 7 indicates that the proteins have totally different overall structural folds. Distance 0 means that some of the annotations are missing and the distance can not be automatically calculated. Column 4 details the cluster members by their PDB code, protein and RNA chains and nucleotide identities (numbered according to their appearance on the RNA strand). Column 4 details the existing pre-SCOP superfamily annotations of the cluster members.

| Num.                    | Clust. Size | Scop Dist. | Cluster Members                                                                                              | Pre-SCOP Annotation                                                                                       |
|-------------------------|-------------|------------|--------------------------------------------------------------------------------------------------------------|-----------------------------------------------------------------------------------------------------------|
| <b>AND-set clusters</b> |             |            |                                                                                                              |                                                                                                           |
| 5                       | 3           | 7          | 1jbrACG11 1f7uABA31 2j02NAC940                                                                               | Microbial ribonucleases and Aminoacyl-tRNA synthetases and missing                                        |
| 6                       | 3           | 0          | 2bh2ACA6 2dr8ABC15 1m90TAA58                                                                                 | missing and Ribosomal proteins S24e, L23 and L15e                                                         |
| 9                       | 2           | 0          | 1vqoQ9A11 1ffyATA37                                                                                          | missing and Aminoacyl-tRNA synthetases                                                                    |
| 16                      | 2           | 0          | 1u0bBAA21 2j01PAA173                                                                                         | Aminoacyl-tRNA synthetases and missing                                                                    |
| 25                      | 2           | 0          | 1mmsACU11 2j02LAG495                                                                                         | Ribosomal protein L11 and missing                                                                         |
| 28                      | 1           | N/A        | 2j011AG182                                                                                                   | missing                                                                                                   |
| 32                      | 6           | 7          | 2j016AA2104 1vqoN9A11<br>1m90CAC1831 1m90MAA155<br>2j02NAG1161 1m903AG1377                                   | missing and Translation proteins SH3-like and Ribosomal proteins L15p and L18e and Ribosomal protein L39e |
| 34                      | 3           | 0          | 2j017AG427 2j02PAA573 1xokCAG3                                                                               | missing                                                                                                   |
| 35                      | 2           | 0          | 2j017AA749 2j018AG2200                                                                                       | missing                                                                                                   |
| 36                      | 3           | 0          | 2j018AG219 1m90XAA931<br>2j01FAU1103                                                                         | missing and Ribosomal protein L30p/L7e                                                                    |
| 38                      | 1           | N/A        | 2j01DAA744                                                                                                   | missing                                                                                                   |
| 41                      | 1           | N/A        | 2j01DAA1454                                                                                                  | missing                                                                                                   |
| 42                      | 1           | N/A        | 2j01DAG1667                                                                                                  | missing                                                                                                   |
| 44                      | 8           | 7          | 2j01DAA1828 1s03HAU28<br>2j02LAC528 2j01EAG1889<br>2j01VAA513 2j02CAU399 1a9nBQC17<br>1m902AG1796            | Ribosomal protein S8 and RNA-binding domain and Zn-binding ribosomal proteins and missing                 |
| 50                      | 9           | 7          | 2j01FAA412 2hvyAEU45<br>2j01EAU1030 1m90DAU2677<br>1oaaACG8 2j01RAA1185 1lngABU25<br>2j01PAU2224 1m901AU1613 | Translation proteins and E set domains and SRP19 and Zn-binding ribosomal proteins and missing            |
| 51                      | 1           | N/A        | 2j01FAG629                                                                                                   | missing                                                                                                   |
| 54                      | 1           | N/A        | 2j01FAG1146                                                                                                  | missing                                                                                                   |
| 55                      | 5           | 0          | 2j01FAU1153 2j01DAA1386<br>2j01NAC947 1m90DAA2559<br>2j015AG1913                                             | Translation proteins and missing                                                                          |
| 58                      | 1           | N/A        | 2j01IAA2026                                                                                                  | missing                                                                                                   |
| 60                      | 2           | 0          | 2j01NAG2598 1m90HAG235                                                                                       | missing and L30e-like                                                                                     |
| 66                      | 4           | 7          | 2j01QAG2300 1m904AU2167<br>1qtqABA70 2j02JAU1085                                                             | missing and Zn-binding ribosomal proteins and Ribosomal protein L25-like                                  |
| 70                      | 1           | N/A        | 2j01RAA2539                                                                                                  | missing                                                                                                   |

|     |   |     |                                                                                                                |                                                                                                                                                               |
|-----|---|-----|----------------------------------------------------------------------------------------------------------------|---------------------------------------------------------------------------------------------------------------------------------------------------------------|
| 76  | 2 | 0   | 2j01UAC947 2j0sTEU1                                                                                            | missing                                                                                                                                                       |
| 81  | 2 | 0   | 2j01WAG459 2j015AA2395                                                                                         | missing                                                                                                                                                       |
| 84  | 2 | 0   | 2j01WAA1498 1m901AG1563                                                                                        | missing and Zn-binding ribosomal proteins                                                                                                                     |
| 86  | 5 | 0   | 2j01XAU1239 2j01FAG761<br>2j01UAG1146 1m90CAA874<br>2j02GAU1340                                                | missing and Translation proteins SH3-like domain                                                                                                              |
| 87  | 4 | 0   | 2j02BAA1061 2j02DAA4 1ooaACG23<br>2j01EAA2551                                                                  | missing and E set domains                                                                                                                                     |
| 92  | 1 | N/A | 2j02GAG659                                                                                                     | missing                                                                                                                                                       |
| 95  | 1 | N/A | 2j02GAA1336                                                                                                    | missing                                                                                                                                                       |
| 97  | 2 | 0   | 2j02HAA619 1m90NAG370                                                                                          | missing and Ribosomal proteins S24e, L23 and L15e                                                                                                             |
| 99  | 5 | 7   | 2j02JAA935 2j01HAC2484<br>1m90GAC2407 2j012AU66 1r3eACC11                                                      | Ribosomal protein L6 and PUA domain-like and missing                                                                                                          |
| 101 | 3 | 0   | 2j02KAG684 2j02QAC530<br>1m90CAG2097                                                                           | missing and Translation proteins SH3-like                                                                                                                     |
| 107 | 1 | N/A | 2j02MYA12                                                                                                      | missing                                                                                                                                                       |
| 109 | 7 | 7   | 2j02NAU1009 2j02EAA1357<br>1m90QAC1667 1m90NAC1823<br>2j01WAA711 1m90SAA832<br>2j01RAA2664                     | Ribosomal protein L19 (L19e) and Ribosomal proteins S24e, L23 and L15e and Ribosomal protein L22 and missing                                                  |
| 116 | 2 | 0   | 2j02UAA1245 2j02CAA498                                                                                         | missing                                                                                                                                                       |
| 117 | 3 | 0   | 2ipyACU6 2j01TAG2681 2j01FAA1917                                                                               | missing                                                                                                                                                       |
| 119 | 1 | N/A | 2ipyACU19                                                                                                      | missing                                                                                                                                                       |
| 122 | 3 | 7   | 1m902AU765 1m90EAG661<br>2j01EAA2634                                                                           | Zn-binding ribosomal proteins and Ribosomal protein L4 and missing                                                                                            |
| 123 | 3 | 0   | 1m902AU1433 2j02GAU1199<br>2j01OAA1809                                                                         | Zn-binding ribosomal proteins and missing                                                                                                                     |
| 125 | 1 | N/A | 1m903AA50                                                                                                      | Ribosomal protein L39e                                                                                                                                        |
| 126 | 3 | 0   | 1m903AC78 2j01DAG1396<br>2j02TAC177                                                                            | Ribosomal protein L39e and missing                                                                                                                            |
| 129 | 3 | 0   | 1m904AU385 2j01TAC1620<br>2j01RAA2523                                                                          | Zn-binding ribosomal proteins and missing                                                                                                                     |
| 131 | 1 | N/A | 1m904AA2222                                                                                                    | Zn-binding ribosomal proteins                                                                                                                                 |
| 137 | 1 | N/A | 1m90CAA1900                                                                                                    | Translation proteins SH3-like domain                                                                                                                          |
| 140 | 1 | N/A | 1m90DAA1691                                                                                                    | Translation proteins                                                                                                                                          |
| 143 | 1 | N/A | 1m90EAA438                                                                                                     | Ribosomal protein L4                                                                                                                                          |
| 145 | 1 | N/A | 1m90EAG748                                                                                                     | Ribosomal protein L4                                                                                                                                          |
| 146 | 7 | 7   | 1m90EAA882 2j01SAG2152<br>2j01EAA2390 1m904AC2269<br>1m90IAA1110 2j02LAA489<br>2j01TAU2663                     | Ribosomal protein L4 and Zn-binding ribosomal proteins and Ribosomal protein L10 and missing                                                                  |
| 147 | 3 | 0   | 1m90EAA1312 2j01DAG1682<br>2j01XAA65                                                                           | Ribosomal protein L4 and missing                                                                                                                              |
| 148 | 9 | 7   | 1m90EAU1319 1ytuACA1 2bg-<br>gAPU1 2j01RAA1173 1m90OAA2195<br>1m904AA2310 1m903AA451<br>1m90GAA2633 2j01PAU771 | Ribosomal protein L4 and Translational machinery components and Zn-binding ribosomal proteins and Ribosomal protein L39e and Ribosomal protein L6 and missing |

|                        |    |     |                                                                                      |                                                      |                                                                                                                                                                 |
|------------------------|----|-----|--------------------------------------------------------------------------------------|------------------------------------------------------|-----------------------------------------------------------------------------------------------------------------------------------------------------------------|
| 149                    | 4  | 7   | 1m90FAA2187<br>1u0bBAA36 2asbABU9                                                    | 1m90WAA87                                            | Ribosomal protein L5 and Ribosomal protein L29 (L29p) and Aminoacyl-tRNA synthetases and missing                                                                |
| 154                    | 1  | N/A | 1m90KAG1079                                                                          |                                                      | Ribosomal protein L13                                                                                                                                           |
| 159                    | 1  | N/A | 1m90MAG733                                                                           |                                                      | Ribosomal proteins L15p and L18e                                                                                                                                |
| 161                    | 1  | N/A | 1m90NAG164                                                                           |                                                      | Ribosomal proteins S24e, L23 and L15e                                                                                                                           |
| 163                    | 7  | 7   | 1m90NAA1430<br>2j02TAG97 1m90CAG865<br>1mzpABG37 2j02PAA352                          | 2j02IAC1107<br>2j01UAA961                            | Ribosomal proteins S24e, L23 and L15e and Translation proteins SH3-like and Ribosomal protein L1 and missing                                                    |
| 166                    | 8  | 7   | 1m90OAA2210 1m90MAA689<br>ACA19 2bteABU20 2ipyACC8<br>2f8kABG9 1m90LAC1940 1gaxACC37 | 1gax-                                                | Translational machinery components and Ribosomal proteins L15p and L18e and tRNA-binding arm and Ribosomal protein L14                                          |
| 168                    | 1  | N/A | 1m90QAA1556                                                                          |                                                      | Ribosomal protein L19 (L19e)                                                                                                                                    |
| 170                    | 1  | N/A | 1m90RAC2234                                                                          |                                                      | Translation proteins SH3-like domain                                                                                                                            |
| 175                    | 3  | 7   | 1m90VAU2706<br>2j02LAC484                                                            | 1k8wABC14                                            | Glucocorticoid receptor-like and PUA domain-like and missing                                                                                                    |
| 176                    | 10 | 7   | 1m90VAA2730<br>2j016AU2162<br>2j01QAG2068<br>1m90DAU1194<br>1m90UAC22 1m90UAA320     | 1qf6ABA34<br>2j02GAA1305<br>1m90MAU892<br>1m90XAG577 | Glucocorticoid receptor-like and Class II aaRS ABD-related and Ribosomal proteins L15p and L18e and Translation proteins and Ribosomal protein L30p/L7e         |
| 180                    | 9  | 7   | 1m90ZAG1275<br>1m90KAG2655<br>2j01WAG1164 1qvg23C2<br>1jbsACG4 2j02MAU1261           | 2j01UAA1055<br>1m90PAA648<br>2bu1ARA10               | Ribosomal protein L32e and Ribosomal protein L13 and Ribosomal proteins L15p and L18e and Zn-binding ribosomal proteins and Microbial ribonucleases and missing |
| 181                    | 2  | 0   | 2gjwAEA12 2pjpABU6                                                                   |                                                      | missing                                                                                                                                                         |
| <b>OR-set clusters</b> |    |     |                                                                                      |                                                      |                                                                                                                                                                 |
| 0                      | 1  | N/A | 2asbABU9                                                                             |                                                      | missing                                                                                                                                                         |
| 1                      | 1  | N/A | 1k8wABC14                                                                            |                                                      | PUA domain-like                                                                                                                                                 |
| 2                      | 1  | N/A | 1jbsACG4                                                                             |                                                      | Microbial ribonucleases                                                                                                                                         |
| 3                      | 4  | N/A | 2f8kABG9 2j02BAA1061<br>2ipyACC8                                                     | 1lngABU25                                            | missing and SRP19                                                                                                                                               |
| 7                      | 1  | N/A | 1f7uABA31                                                                            |                                                      | Aminoacyl-tRNA synthetases                                                                                                                                      |
| 8                      | 1  | N/A | 1qtqABA70                                                                            |                                                      | Ribosomal protein L25-like                                                                                                                                      |
| 9                      | 1  | N/A | 2pjpABU6                                                                             |                                                      | missing                                                                                                                                                         |
| 11                     | 3  | N/A | 2hvyAEU45 2gjwAEA12<br>10oaACG8 2bu1ARA10 1mmsACU11                                  | 2bh2ACA6                                             | missing                                                                                                                                                         |
| 12                     | 3  | 7   |                                                                                      |                                                      | E set domains and Ribosomal protein L11 and missing                                                                                                             |
| 13                     | 1  | N/A | 10oaACG23                                                                            |                                                      | E set domains                                                                                                                                                   |
| 15                     | 2  | 7   | 1mzpABG37 1ffyATA37                                                                  |                                                      | Ribosomal protein L1 and Aminoacyl-tRNA synthetases                                                                                                             |
| 16                     | 1  | N/A | 2j011AG182                                                                           |                                                      | missing                                                                                                                                                         |
| 18                     | 1  | N/A | 2ipyACU6                                                                             |                                                      | missing                                                                                                                                                         |
| 20                     | 1  | N/A | 2ipyACU19                                                                            |                                                      | missing                                                                                                                                                         |

|    |   |     |             |                               |
|----|---|-----|-------------|-------------------------------|
| 21 | 1 | N/A | 1m901AG1563 | Zn-binding ribosomal proteins |
| 22 | 1 | N/A | 1m901AU1613 | Zn-binding ribosomal proteins |
| 24 | 1 | N/A | 1qf6ABA34   | Class II aaRS ABD-related     |
| 25 | 1 | N/A | 1xokCAG3    | missing                       |
