# Supplementary material
Source: PubMed Central journal article supplement (PMC2429989)
Supplement: NIHMS52300-supplement-04.pdf [file NIHMS52300-supplement-04.pdf]

**Table S4: Clusters of dinucleotide binding sites in the AND-set dataset.** The first column is the cluster number (according to the enumeration of the binding site that originated the cluster). The second column specifies the maximal SCOP distance between the cluster members. Proteins at distance 3 belong to the same SCOP super family, while proteins at distance 7 have totally different overall folds and no common structural annotation. The distance was measured according the pre-SCOP annotation when available. Distance 0 means that some of the annotations are missing and the distance can not be automatically calculated. Column 3 indicates whether the proteins have similar sequences (more than 25% sequence identity or same Pfam annotation). Column 4 details whether all the cluster dinucleotide pairs are  $\pi$ -stacked (1) or non  $\pi$ -stacked (2). Column 5 indicates the number of binding sites in the cluster and column 6 provides the cluster members and column 7 details their pre-SCOP annotation.

| Cl. | Scop dist. | Sim. seq. | $\pi$ type | Cluster size | Cluster members (pdb:chains:nts)                                              | Pre-SCOP annotations                                         |
|-----|------------|-----------|------------|--------------|-------------------------------------------------------------------------------|--------------------------------------------------------------|
| 3   | 0          | 1         | 2          | 2            | 1wpuACU6U7 2gztADU13U14                                                       | missing                                                      |
| 12  | 0          | 0         | 2          | 3            | 2gztADU10A11 1wpuACG3A4 2j02HAU607A608                                        | missing                                                      |
| 14  | 0          | 1         | 2          | 2            | 2gztADG12U13 1wpuACG5U6                                                       | missing                                                      |
| 21  | 3          | 1         | 2          | 6            | 1sdsADG9U10 2hvyDEA31U32 1m90HAA251U252 1rl-gACG15U16 2ozbACA11U12 1e7kACA5U6 | L30e-like and missing                                        |
| 23  | 7          | 0         | 2          | 2            | 1fxlABU1U2 1pv0AGU1C2                                                         | RNA-binding domain and Rho termination factor                |
| 25  | 3          | 1         | 2          | 2            | 1fxlABU3U4 1b7fAPU6U7                                                         | RNA-binding domain                                           |
| 28  | 6          | 0         | 2          | 2            | 1fxlABU6U7 1sdsADU10G11                                                       | RNA-binding domain and L30e-like                             |
| 29  | 3          | 1         | 2          | 2            | 1fxlABU7U8 1b7fAPU10U11                                                       | RNA-binding domain                                           |
| 41  | 0          | 0         | 2          | 3            | 2anrABU12C13 2py9AFC9C10 1ec6ADU12C13                                         | missing and Eukaryotic type KH-domain (KH-domain type I)     |
| 42  | 0          | 0         | 2          | 3            | 2anrABC13A14 1ec6ADC13A14 2py9AFC10C11                                        | missing and Eukaryotic type KH-domain (KH-domain type I)     |
| 47  | 0          | 1         | 2          | 2            | 2b3jAEC7G8 2b3jCGC5G6                                                         | missing                                                      |
| 52  | 2          | 1         | 3          | 3            | 1r3eACC7G8 1k8wABC10G11 2ix1ABA8A9                                            | PUA domain-like and missing                                  |
| 54  | 7          | 0         | 3          | 2            | 1n78ACC33U34 1b7fAPU3G4                                                       | Aminoacyl-tRNA synthetases and RNA-binding domain            |
| 55  | 0          | 0         | 3          | 3            | 1n78ACU34C35 1wpuACA4G5 2gztADA11G12                                          | Aminoacyl-tRNA synthetases and missing                       |
| 58  | 7          | 0         | 1          | 2            | 1n78ACC73A74 1qtqABC73A74                                                     | Aminoacyl-tRNA synthetases and Ribosomal protein L25-like    |
| 59  | 7          | 0         | 2          | 2            | 1jbrACA16G17 1m90PAA689U690                                                   | Microbial ribonucleases and Ribosomal proteins L15p and L18e |
| 61  | 0          | 0         | 1          | 2            | 2bh2ACU8C9 1hq1ABA11C12                                                       | missing and Signal peptide-binding domain                    |
| 67  | 0          | 0         | 2          | 2            | 2bh2ACG22U23 2du3ADA35G36                                                     | missing                                                      |

|     |   |   |   |   |                                                                                 |                                                           |
|-----|---|---|---|---|---------------------------------------------------------------------------------|-----------------------------------------------------------|
| 76  | 0 | 0 | 2 | 2 | 1yvpACC7G8 1il2ACC66A67                                                         | missing and Nucleic acid-binding proteins                 |
| 78  | 0 | 1 | 2 | 3 | 1yvpAGC2C3 2i91ADU11C12<br>1yvpAGC3G4                                           | missing                                                   |
| 81  | 0 | 0 | 3 | 3 | 1m8xACU2G3 1m8xACU4A5<br>1m8xACU6A7                                             | ARM repeat                                                |
| 82  | 0 | 0 | 2 | 3 | 1m8xACG3U4 1m8xACA7U8<br>1m8xACA5U6                                             | ARM repeat                                                |
| 94  | 7 | 1 | 2 | 6 | 1m5oCBC40A41 1sj3PRC53A54<br>1urnAPC10A11 1a9nBQC11A12<br>2a8vADC1C2 2a8vBEC1C2 | RNA-binding domain and Rho termination factor             |
| 97  | 1 | 1 | 1 | 3 | 1sj3PRA49U50 1m5oCBA36U37<br>1urnAPA6U7                                         | RNA-binding domain                                        |
| 99  | 3 | 1 | 1 | 4 | 1sj3PRU51G52 1urnAPU8G9<br>1a9nBQU9G10 1m5oCBU38G39                             | RNA-binding domain                                        |
| 100 | 3 | 1 | 2 | 5 | 1sj3PRG52C53 1m5oCBG39C40<br>1urnAPG9C10 1a9nBQG10C11<br>2g4bABU4U5             | RNA-binding domain and missing                            |
| 103 | 0 | 0 | 2 | 2 | 1qtqABC32U33 2q66AXA3A4                                                         | Ribosomal protein L25-like and missing                    |
| 105 | 7 | 0 | 2 | 2 | 1qtqABC72C73 1n78ACC72C73                                                       | Ribosomal protein L25-like and Aminoacyl-tRNA synthetases |
| 108 | 0 | 0 | 2 | 2 | 1wsuAEG11U12 2pj-<br>pABG12U13                                                  | missing                                                   |
| 120 | 3 | 1 | 2 | 3 | 1a9nBQU8U9 1sj3PRU50U51<br>1urnAPU7U8                                           | RNA-binding domain                                        |
| 124 | 7 | 1 | 1 | 5 | 1a9nBQA12G13<br>1m5oCBA41C42 1urnAPA11C12<br>1sj3PRA54C55 1u0bBAG33C34          | RNA-binding domain and Aminoacyl-tRNA synthetases         |
| 134 | 2 | 1 | 3 | 3 | 1c0aABU31C32 1il2ACU31C32<br>1asyARU31C32                                       | Nucleic acid-binding proteins                             |
| 137 | 1 | 1 | 1 | 2 | 1c0aABC66C67 1il2ACC65C66                                                       | Nucleic acid-binding proteins                             |
| 157 | 0 | 0 | 2 | 2 | 2g4bABU5U6 1b7fAPU9U10                                                          | missing and RNA-binding domain                            |
| 159 | 1 | 1 | 2 | 6 | 2iznARU9A10 1zdjARC5A6<br>7msfARC8A9 6msfARC8A9<br>2bs0ARA6A7 2b2dCSA1A2        | missing and RNA bacteriophage capsid protein              |
| 164 | 0 | 0 | 1 | 3 | 2py9AFC11U12 1ec6ADA14C15<br>2anrABA14C15                                       | missing and Eukaryotic type KH-domain (KH-domain type I)  |
| 168 | 7 | 0 | 1 | 2 | 1cvjAMA4A5 1knzAWG2A3                                                           | RNA-binding domain and NSP3 homodimer                     |
| 175 | 0 | 1 | 1 | 2 | 1g1xBEA13A14<br>2j02OAA694A695                                                  | S15/NS1 RNA-binding domain and missing                    |
| 178 | 0 | 1 | 1 | 2 | 1g1xCEC5G6 2j02RAC686G687                                                       | Ribosomal protein S18 and missing                         |
| 182 | 2 | 0 | 2 | 2 | 1il2ACG30U31 1asyARG30U31                                                       | Nucleic acid-binding proteins                             |
| 184 | 1 | 1 | 1 | 2 | 1il2ACG64C65 1c0aABG65C66                                                       | Nucleic acid-binding proteins                             |
| 194 | 3 | 1 | 2 | 2 | 1b7fAPG4U5 1cvjAMA8A9                                                           | RNA-binding domain                                        |

|     |   |   |   |   |                                                             |                                                                      |
|-----|---|---|---|---|-------------------------------------------------------------|----------------------------------------------------------------------|
| 195 | 3 | 1 | 2 | 2 | 1b7fAPU5U6 1fxlABU2U3                                       | RNA-binding domain                                                   |
| 198 | 3 | 1 | 2 | 2 | 1b7fAPU8U9 1fxlABA5U6                                       | RNA-binding domain                                                   |
| 202 | 3 | 1 | 2 | 4 | 2ozbACA10A11 1e7kACA4A5<br>1m90HAA250A251 2hvy-<br>DEC30A31 | missing and L30e-like                                                |
| 208 | 2 | 1 | 2 | 2 | 1i6uACU25A26 1s03HAA13A14                                   | Ribosomal protein S8                                                 |
| 235 | 0 | 0 | 2 | 2 | 2j017AG116G117 1jid-<br>ABG11G12                            | missing and SRP19                                                    |
| 242 | 0 | 0 | 2 | 2 | 2j01FAA293G294<br>1m90EAA316U317                            | missing and Ribosomal protein<br>L4                                  |
| 280 | 0 | 1 | 1 | 2 | 2j02RAG684C685 1g1xCEG3C4                                   | missing and Ribosomal protein<br>S18                                 |
| 281 | 0 | 1 | 3 | 2 | 2j02RAC685C686 1g1xCEC4C5                                   | missing and Ribosomal protein<br>S18                                 |
| 299 | 0 | 1 | 2 | 2 | 1m90CAA862A863<br>2j01DAA741A742                            | Translation proteins SH3-like do-<br>main and missing                |
| 302 | 0 | 1 | 2 | 2 | 1m90CAA1834C1835<br>2j01DAA1685U1686                        | Translation proteins SH3-like do-<br>main and missing                |
| 354 | 7 | 0 | 2 | 2 | 1q2rAEC8U9 1u0bBAC73A74                                     | tRNA-guanine transglycosy-<br>lase and Aminoacyl-tRNA<br>synthetases |
| 362 | 0 | 0 | 3 | 2 | 1asyARC65C66 1asyARC66A67                                   | Nucleic acid-binding proteins                                        |
