# Supplementary material
Source: PubMed Central journal article supplement (PMC2429989)
Supplement: NIHMS52300-supplement-05.pdf [file NIHMS52300-supplement-05.pdf]

**Table S5: Clusters of dinucleotide binding sites in the OR-set dataset.** The first column is the cluster number (according to the enumeration of the binding site that originated the cluster). The second column specifies the maximal SCOP distance between the cluster members. Proteins at distance 3 belong to the same SCOP super family, while proteins at distance 7 have totally different overall folds and no common structural annotation. The distance was measured according the pre-SCOP annotation when available. Distance 0 means that some of the annotations are missing and the distance can not be automatically calculated. Column 3 indicates whether the proteins have similar sequences (more than 25% sequence identity or same Pfam annotation). Column 4 details whether all the cluster dinucleotide pairs are  $\pi$ -stacked (1) or non  $\pi$ -stacked (2). Column 5 indicates the number of binding sites in the cluster and column 6 provides the cluster members and column 7 details their pre-SCOP annotation.

| Cl. | Scop dist. | Same Pfam | $\pi$ type | Cluster size | Cluster members (pdb:chains:nts)       | Pre-SCOP annotations                                      |
|-----|------------|-----------|------------|--------------|----------------------------------------|-----------------------------------------------------------|
| 0   | 0          | 0         | 2          | 2            | 1wpuACG3A4 1i6uACU25A26                | missing and Ribosomal protein S8                          |
| 18  | 0          | 0         | 2          | 2            | 1fxlABU1U2 1fxlABU7U8                  | RNA-binding domain                                        |
| 23  | 6          | 0         | 2          | 2            | 1fxlABU6U7 1sdsADU10G11                | RNA-binding domain and L30e-like                          |
| 32  | 0          | 0         | 1          | 2            | 1urnAPU8G9 1urnAPA11C12                | RNA-binding domain                                        |
| 34  | 7          | 0         | 2          | 2            | 1urnAPC10A11 2a8vADC1C2                | RNA-binding domain and Rho termination factor             |
| 36  | 0          | 0         | 2          | 3            | 2anrABU12C13 2py9AFC9C10 1ec6ADU12C13  | missing and Eukaryotic type KH-domain (KH-domain type I)  |
| 37  | 0          | 0         | 2          | 3            | 2anrABC13A14 1ec6ADC13A14 2py9AFC10C11 | missing and Eukaryotic type KH-domain (KH-domain type I)  |
| 46  | 0          | 0         | 3          | 2            | 1n78ACC33U34 2bx2LRU1U2                | Aminoacyl-tRNA synthetases and missing                    |
| 47  | 0          | 0         | 3          | 2            | 1n78ACU34C35 1wpuACA4G5                | Aminoacyl-tRNA synthetases and missing                    |
| 49  | 7          | 0         | 2          | 2            | 1n78ACC72C73 1qtqABC72C73              | Aminoacyl-tRNA synthetases and Ribosomal protein L25-like |
| 50  | 7          | 0         | 1          | 2            | 1n78ACC73A74 1qtqABC73A74              | Aminoacyl-tRNA synthetases and Ribosomal protein L25-like |
| 68  | 0          | 0         | 2          | 2            | 1m8xBDU1G2 1m8xBDU3A4                  | ARM repeat                                                |
| 69  | 0          | 0         | 2          | 2            | 1m8xBDG2U3 1m8xBDA6U7                  | ARM repeat                                                |
| 72  | 6          | 0         | 3          | 2            | 1m8xBDU5A6 1hq1ABA11C12                | ARM repeat and Signal peptide-binding domain              |
| 78  | 0          | 0         | 2          | 2            | 1qtqABC32U33 2q66AXA3A4                | Ribosomal protein L25-like and missing                    |
| 89  | 0          | 0         | 2          | 2            | 1ec6ADA11U12 1yvpAGC2C3                | Eukaryotic type KH-domain (KH-domain type I) and missing  |
| 110 | 0          | 0         | 1          | 3            | 2py9AFC11U12 1ec6ADA14C15 2anrABA14C15 | missing and Eukaryotic type KH-domain (KH-domain type I)  |
| 143 | 0          | 0         | 2          | 2            | 1asyARG30U31 2bh2ACG22U23              | Nucleic acid-binding proteins and missing                 |
| 144 | 2          | 0         | 3          | 2            | 1asyARU31C32 1c0aABU31C32              | Nucleic acid-binding proteins                             |

|     |   |   |   |   |                           |                               |
|-----|---|---|---|---|---------------------------|-------------------------------|
| 146 | 0 | 0 | 3 | 2 | 1asyARC65C66 1asyARC66A67 | Nucleic acid-binding proteins |
|-----|---|---|---|---|---------------------------|-------------------------------|
