# Supplementary material
Source: PubMed Central journal article supplement (PMC2429989)
Supplement: NIHMS52300-supplement-06.pdf [file NIHMS52300-supplement-06.pdf]

## Supplementary Tables 6-9

| 1fxlABU1U2       |            |             | 1pvoAGU1C2      |            |             |      |
|------------------|------------|-------------|-----------------|------------|-------------|------|
| Chain.<br>R. Num | R.<br>Type | Ps.<br>Type | Chain<br>R. Num | R.<br>Type | Ps.<br>Type | Type |
| A.128            | Tyr        | DAC         | A.80            | Tyr        | DAC         | s    |
| A.128            | Tyr        | PII         | A.80            | Tyr        | PII         | s    |
| A.155            | Arg        | ALI         | A.58            | Leu        | ALI         | s    |
| A.170            | Phe        | PII         | A.64            | Phe        | PII         | s    |
| A.172            | Arg        | DON         | A.75            | Gly        | DON         |      |
| A.201            | Lys        | ALI         | A.112           | Ala        | ALI         | s    |
| A.203            | Ala        | ACC         | A.110           | Tyr        | ACC         | b    |

**Table S6: Similar Phe-Tyr binding platform.** Alignment between HuD RBD (1fxl) and Rho terminating factor (1pvo) according to the similarity of dinucleotide binding sites revealed by the AND-set cluster 23. Each rows details the matched pseudocenters of two binding sites. Each three columns present the details of a specific site: (i) chain identifier and residue number; (ii) residue type; (iii) pseudocenter type, which can be donor (DON), acceptor (ACC), mixed donor/acceptor (DAC), hydrophobic aliphatic (ALI) or aromatic (PI). The last column presents the origin of the feature: backbone(b) or side-chain(s) if it is the same for all the matched pseudocenters.

| 1m5oCBC40A4I     |            |             | 1sj3PRC53A54     |            |             | 1urnAPC10A1I     |            |             | 1a9nBQC11A12     |            |             | 2a8vADC1C2       |            |             | 2a8vBEC1C2       |            |             |
|------------------|------------|-------------|------------------|------------|-------------|------------------|------------|-------------|------------------|------------|-------------|------------------|------------|-------------|------------------|------------|-------------|
| Chain.<br>R. Num | R.<br>Type | Ps.<br>Type |
| C.13             | Tyr        | PI          | P.13             | Tyr        | PI          | A.13             | Tyr        | PI          | B.13             | Tyr        | PI          | A.80             | Tyr        | PI          | B.80             | Tyr        | PII         |
| C.56             | Phe        | PI          | P.56             | Phe        | PI          | A.56             | Phe        | PI          | B.56             | Phe        | PI          | A.64             | Phe        | PI          | B.64             | Phe        | PI          |
| C.88             | Lys        | DON         | P.88             | Lys        | DON         | A.88             | Lys        | DON         | B.88             | Lys        | DON         | A.110            | Tyr        | DON         | B.110            | Tyr        | DON         |
| C.89             | Thr        | DAC         | P.89             | Thr        | DAC         | A.89             | Thr        | DAC         | B.89             | Thr        | DAC         | A.110            | Tyr        | DAC         | B.110            | Tyr        | DAC         |
| C.91             | Ser        | DAC         | P.91             | Ser        | DAC         | A.91             | Ser        | DAC         | B.91             | Ser        | DAC         | A.78             | Asp        | ACC         | B.78             | Asp        | ACC         |

**Table S7: Phe-Tyr binding platform of RBDs.** The common physico-chemical properties revealed by the alignment of 6 dinucleotide binding sites of RRM1s and Rho termination factors of the AND-set cluster 94 (see Supplementary Table S4). The columns headers are as in Table S6.

| 1m8xACU2G3U4     |            |             | 1m8xACU4A5U6    |            |             | 1m8xACU6A7U8    |            |             | Type |
|------------------|------------|-------------|-----------------|------------|-------------|-----------------|------------|-------------|------|
| Chain.<br>R. Num | R.<br>Type | Ps.<br>Type | Chain<br>R. Num | R.<br>Type | Ps.<br>Type | Chain<br>R. Num | R.<br>Type | Ps.<br>Type |      |
| A.1043           | Asn        | ACC         | A.971           | Asn        | ACC         | A.899           | Asn        | ACC         | s    |
| A.1044           | Tyr        | PI          | A.972           | His        | PI          | A.900           | Tyr        | PI          | s    |
| A.1047           | Gln        | ACC         | A.975           | Gln        | ACC         | A.903           | Gln        | ACC         | s    |
| A.1047           | Gln        | DON         | A.975           | Gln        | DON         | A.903           | Gln        | DON         | s    |
| A.1076           | Lys        | ACC         | A.1004          | Pro        | ACC         | A.932           | Met        | ACC         | b    |
| A.1080           | Asn        | DON         | A.1008          | Arg        | DON         | A.936           | Arg        | DON         | s    |
| A.1083           | Glu        | ACC         | A.1011          | Gln        | ACC         | A.939           | Gln        | ACC         | s    |
| A.1119           | Gln        | ACC         | A.1040          | Gln        | ACC         | A.968           | Gln        | ACC         | b    |
| A.1120           | Tyr        | DAC         | A.1041          | Tyr        | DAC         | A.968           | Gln        | ACC         | s    |
| A.1122           | Asn        | ACC         | A.1043          | Asn        | ACC         | A.971           | Asn        | ACC         | s    |
| A.1123           | Tyr        | DAC         | A.1044          | Tyr        | DAC         | A.972           | His        | DAC         | s    |
| A.1123           | Tyr        | PI          | A.1044          | Tyr        | PI          | A.972           | His        | PI          | s    |
| A.1126           | Gln        | ACC         | A.1047          | Gln        | ACC         | A.975           | Gln        | ACC         | s    |
| A.1126           | Gln        | DON         | A.1047          | Gln        | DON         | A.975           | Gln        | DON         | s    |

**Table S8: Repetitive patterns of Pumilio protein.** The MultiBind alignment of the 2 consecutive repetitive dinucleotide binding sites of the Pumilio protein (PDB:1m8x, AND-set clusters 81-82). These are located on the repeats 6-8, 4-5 and 2-4, which are described by the three main table columns respectively. The sub columns headers are as in Table S5.

| 2anrABU12C13A14C15 |            |             | 2py9AFC9C10C11U12 |            |             | 1ec6ADU12C13A14C15 |            |             | Type |
|--------------------|------------|-------------|-------------------|------------|-------------|--------------------|------------|-------------|------|
| Chain.<br>R. Num   | R.<br>Type | Ps.<br>Type | Chain<br>R. Num   | R.<br>Type | Ps.<br>Type | Chain<br>R. Num    | R.<br>Type | Ps.<br>Type |      |
| A.14               | Ser        | ACC         | A.22              | Gly        | ACC         | A.14               | Glu        | ACC         | b    |
| A.15               | Tyr        | ACC         | A.23              | Lys        | ACC         | A.15               | Asn        | ACC         | b    |
| A.18               | Gly        | PI          | A.26              | Gly        | PI          | A.18               | Gly        | PI          | b    |
| A.18               | Gly        | ACC         | A.26              | Gly        | ACC         | A.18               | Gly        | ACC         | b    |
| A.19               | Ser        | DON         | A.27              | Ser        | DON         | A.19               | Ala        | DON         | b    |
| A.21               | Ile        | ALI         | A.29              | Ile        | ALI         | A.21               | Leu        | ALI         | s    |
| A.22               | Gly        | PI          | A.30              | Gly        | PI          | A.22               | Gly        | PI          | b    |
| A.22               | Gly        | ACC         | A.30              | Gly        | ACC         | A.22               | Gly        | ACC         | b    |
| A.23               | Lys        | DON         | A.31              | Lys        | DON         | A.23               | Lys        | DON         | b    |
| A.23               | Lys        | ALI         | A.31              | Lys        | ALI         | A.23               | Lys        | ALI         | s    |
| A.24               | Gly        | DON         | A.32              | Lys        | DON         | A.24               | Gly        | DON         | b    |
| A.24               | Gly        | PI          | A.32              | Lys        | PI          | A.24               | Gly        | PI          | b    |
| A.24               | Gly        | ACC         | A.32              | Lys        | ACC         | A.24               | Gly        | ACC         | b    |
| A.25               | Gly        | DON         | A.33              | Gly        | DON         | A.25               | Gly        | DON         | b    |
| A.28               | Ile        | ALI         | A.36              | Val        | ALI         | A.28               | Leu        | ALI         | s    |
| A.29               | Val        | ALI         | A.37              | Lys        | ALI         | A.29               | Val        | ALI         | s    |
| A.32               | Gln        | DON         | A.40              | Arg        | DON         | A.32               | Gln        | DON         | s    |
| A.39               | Ile        | ACC         | A.47              | Ile        | ACC         | A.39               | Ile        | ACC         | b    |
| A.40               | Lys        | DON         | A.48              | Asn        | DON         | A.40               | Gln        | DON         | s    |
| A.41               | Leu        | DON         | A.49              | Ile        | DON         | A.41               | Ile        | DON         | b    |
| A.41               | Leu        | ACC         | A.49              | Ile        | ACC         | A.41               | Ile        | ACC         | b    |
| A.41               | Leu        | ALI         | A.49              | Ile        | ALI         | A.41               | Ile        | ALI         | s    |
| A.54               | Arg        | DON         | A.57              | Arg        | DON         | A.54               | Arg        | DON         | s    |
| A.54               | Arg        | DON         | A.57              | Arg        | DON         | A.54               | Arg        | DON         | s    |

**Table S9: KH-motif patterns** The MultiBind alignment between 3 consecutive dinucleotide binding sites of proteins with KH-motifs: (1) Nova-1 (PDB: 2anrA); (2) Poly(rC)-binding protein 2 (PDB:2py9A); (3) Neuro-oncological ventral antigen 2, Nova-2 (PDB:1ec6A), which are described by the AND-set clusters 164, 41, 42. The columns headers are as in Table S5.
